# Supplementary material for: Nitrogen transfer mechanism of mycorrhizal network between Pinus massoniana Lamb. seedlings
Source: Research Square preprint supplement (doi:10.21203/rs.3.rs-4015336/v1), 2024-03-19
Supplement: Supplementary file 1 [file 4fa7ae1636599261f3552d8f.docx]

**Table**

Table 1 Soil substrate physicochemical properties

| pH | Total nitrogen  (g/kg) | Alkaline nitrogen  (mg/kg) | Total phosphorus  (g/kg) | Available phosphorus  (mg/kg) | Total potassium  (g/kg) | Available potassium  (mg/kg) | Organic matter  (g/kg) |
| --- | --- | --- | --- | --- | --- | --- | --- |
| 4.60 | 0.14 | 87.50 | 0.32 | 28.78 | 10.18 | 134.36 | 13.94 |

Table 2 Mycorrhizal infection of donor and recipient *Pinus massoniana* seedlings under different nitrogen levels

|  | CK | | Sm | |
| --- | --- | --- | --- | --- |
| Treatment | Mycorrhizal infection of donor plant (%) | Mycorrhizal infection of receiver plant (%) | Mycorrhizal infection of donor plant (%) | Mycorrhizal infection of receiver plant (%) |
| N0 | 0 | 0 | 31.61±3.27 c | 26.17±0.96 c |
| N2 | 0 | 0 | 38.42±0.81 b | 31.10±1.83 b |
| N4 | 0 | 0 | 44.48±1.16 a | 43.42±1.46 a |
| N6 | 0 | 0 | 46.69±1.23 a | 41.33±2.61 a |

Note: N0、N2、N4、N6 were 0、2、4、6 g/L, respectively, nitrogen levels treatment; CK was not inoculated, Sm was inoculated; The data were mean ± standard deviation (n=3); Different lowercase letters indicate significant difference among different nitrogen concentrations of the same strain (*P* < 0.05). The same below.

Table 3 The biomass of *Pinus massoniana* seedling’s donor

| Treatment | N level (g/L) | Biomass (g) | | | Root shoot ratio | RMD (%) |
| --- | --- | --- | --- | --- | --- | --- |
| Root | Stem | Leaf |
| CK | N0 | 0.15±0.01 Ab | 0.06±0.02 Ab | 0.14±0.05 Ab | 0.80±0.26 Aa | - |
|  | N2 | 0.15±0.02 Ab | 0.07±0.01 Bb | 0.14±0.01 Bb | 0.72±0.12 Aa | - |
|  | N4 | 0.21±0.03 Aa | 0.19±0.04 Ba | 0.37±0.02 Ba | 0.38±0.03 Ab | - |
|  | N6 | 0.13±0.00 Bb | 0.11±0.05 Ab | 0.29±0.08 Ba | 0.37±0.13 Ab | - |
| Sm | N0 | 0.15±0.05 Ac | 0.12±0.02 Ac | 0.31±0.12 Ac | 0.34±0.02 Ba | 32.36±29.25 a |
|  | N2 | 0.22±0.02 Ab | 0.16±0.02 Ac | 0.49±0.05 Ab | 0.35±0.05 Aa | 57.80±3.24 a |
|  | N4 | 0.25±0.03 Ab | 0.30±0.02 Aa | 0.80±0.09 Aa | 0.23±0.05 Bb | 41.99±8.25 a |
|  | N6 | 0.39±0.00 Aa | 0.24±0.04 Ab | 0.76±0.06 Aa | 0.39±0.04 Aa | 61.86±10.26 a |

Table 4 The biomass of *Pinus massoniana* seedling’s recipient

| Treatment | N level  (g/L) | Biomass (g) | | | Root shoot ratio | RMD (%) |
| --- | --- | --- | --- | --- | --- | --- |
| Root | Stem | Leaf |
| CK | N0 | 0.09±0.01 Bb | 0.07±0.01 Ac | 0.13±0.02 Bc | 0.49±0.03 Aab | - |
|  | N2 | 0.11±0.02 Aab | 0.07±0.02 Ac | 0.10±0.03 Bc | 0.65±0.23 Aa | - |
|  | N4 | 0.13±0.00 Aa | 0.16±0.01 Ba | 0.40±0.02 Aa | 0.24±0.01 Ac | - |
|  | N6 | 0.13±0.01 Ba | 0.11±0.02 Bb | 0.22±0.02 Bb | 0.41±0.02 Abc | - |
| Sm | N0 | 0.21±0.01 Aab | 0.13±0.03 Ab | 0.31±0.04 Ab | 0.47±0.05 Aa | 55.31±9.10 a |
|  | N2 | 0.16±0.02 Ab | 0.15±0.02 Ab | 0.27±0.04 Ab | 0.39±0.06 Aa | 50.91±6.90 a |
|  | N4 | 0.27±0.05 Aa | 0.31±0.00 Aa | 0.67±0.27 Aa | 0.29±0.13 Aa | 42.54±10.81 a |
|  | N6 | 0.23±0.03 Aab | 0.17±0.04 Ab | 0.44±0.08 Aab | 0.38±0.10 Aa | 44.45±1.57 a |

Table 5 The nitrogen uptake of roots, stems, leaves of *Pinus massoniana* seedling’s donor/recipient

|  |  | N uptake (mg/pot ) | | | | | |
| --- | --- | --- | --- | --- | --- | --- | --- |
| N level | Inoculation treatment | Donor | | | Recipient | | |
| (g/L) | Root | Stem | Leaf | Root | Stem | Leaf |
| N0 | CK | 0.89±0.06 Ab | 0.35±0.16 Ab | 0.36±0.10Ac | 0.63±0.12 Bb | 0.21±0.06 Ab | 0.51±0.04Bc |
| Sm | 1.33±0.44 Ac | 0.61±0.07 Ab | 1.85±0.61Ab | 1.45±0.09 Aab | 0.41±0.09 Ab | 1.97±0.29Ab |
| N2 | CK | 0.95±0.22 Bb | 0.29±0.04 Bb | 0.50±0.02Bc | 0.59±0.11 Ab | 0.29±0.09 Aab | 0.37±0.13Bc |
| Sm | 1.86±0.14 Abc | 0.65±0.14 Ab | 3.16±0.51 Aa | 1.18±0.19 Ab | 0.48±0.05 Ab | 1.61±0.19Ab |
| N4 | CK | 1.69±0.39 Aa | 0.68±0.11 Ba | 1.98±0.31 Ba | 0.98±0.07 Ba | 0.40±0.04 Ba | 1.90±0.14 Aa |
| Sm | 2.17±0.55 Ab | 1.18±0.08 Aa | 4.12±0.58 Aa | 2.04±0.38 Aa | 0.88±0.20 Aa | 4.39±2.03 Aa |
| N6 | CK | 0.98±0.02 Bb | 0.54±0.22 Aab | 1.27±0.40 Ab | 0.89±0.15 Aa | 0.36±0.06 Aa | 0.98±0.01 Bb |
| Sm | 3.43±0.08 Aa | 1.05±0.33 Aa | 3.57±0.87 Aa | 1.62±0.58 Aab | 0.51±0.11 Ab | 2.32±0.54 Ab |

Table 6 Contribution rate of ectomycorrhizal fungal hyphae under different nitrogen levels

|  | Inoculation treatment | Donor | | Recipient |
| --- | --- | --- | --- | --- |
| N level (g/L) | Mycelial contribution rate（%） | Mycelial contribution rate（%） | |
| N0 | CK | - | - | |
| Sm | 54.27±17.33 ab | 64.48±5.85 a | |
| N2 | CK | - | - | |
| Sm | 69.17±5.21 a | 61.75±5.97 a | |
| N4 | CK | - | - | |
| Sm | 41.94±5.90 c | 53.2±12.29 a | |
| N6 | CK | - | - | |
| Sm | 64.24±11.81 a | 49.28±4.50 a | |

Table 7 The 15N uptake of roots, stems, leavesof *Pinus massoniana* seedling’s donor/recipient

|  |  | 15N uptake (µg/pot) | | | | | |
| --- | --- | --- | --- | --- | --- | --- | --- |
| N level | Inoculation treatment | Donor | | | Recipient | | |
| (g/L) | Root | Stem | Leaf | Root | Stem | Leaf |
| N0 | CK | 0.30±0.00 Ab | 0.07±0.06 Ab | 0.00±0.00 Bb | 0.17±0.06 Bd | 0.00±0.00 Ac | 0.10±0.00 Ac |
| Sm | 0.73±0.25 Ad | 0.23±0.06 Ab | 1.57±0.50 Ab | 1.00±0.10 Ab | 0.10±0.00 Ac | 0.17±0.06 Ab |
| N2 | CK | 175.27±40.91 Aa | 23.90±3.12 Ab | 43.77±1.33 Bb | 2.50±0.46 Aa | 0.40±0.10 Bb | 0.30±0.10 Ab |
| Sm | 113.83±8.57 Ac | 21.80±4.78 Ab | 84.40±13.62 Ab | 1.23±0.15 Ab | 1.23±0.15 Aa | 0.20±0.00 Ab |
| N4 | CK | 230.67±53.33 Aa | 56.93±9.38 Ba | 159.97±24.69 Ba | 1.97±0.15 Bb | 0.47±0.06 Bb | 0.63±0.06 Aa |
| Sm | 260.60±65.52 Ab | 85.63±5.78 Aa | 283.63±39.86 Aa | 3.37±0.60 Aa | 1.13±0.23 Aa | 4.90±2.25 Aa |
| N6 | CK | 221.57±4.60 Ba | 71.40±29.75 Aa | 161.50±50.64 Aa | 0.77±0.15 Bc | 0.90±0.17 Aa | 0.60±0.00 Ba |
| Sm | 466.53±10.35 Aa | 92.57±29.05 Aa | 328.37±79.92 Aa | 5.10±1.80 Aa | 0.40±0.10 Bb | 1.43±0.31 Ab |

Table 8 The 15N utilization and transfer rate of *P. massoniana* seedling’s donor/recipient

|  | Inoculation treatment | Donor | Recipient |  |
| --- | --- | --- | --- | --- |
| N level  (g/L) | 15N utilization (%) | 15N utilization (%) | Transfer rate  (%) |
| N0 | CK | 0.00±0.00 c | 0.00±0.00 d | 46.26±4.44 Aa |
| Sm | 0.00±0.00 c | 0.00±0.00 c | 34.22±7.66 Aa |
| N2 | CK | 2.02±0.36 Aa | 0.03±0.00 Aa | 1.33±0.18 Ab |
| Sm | 1.83±0.10 Ab | 0.02±0.00 Ab | 1.21±0.14 Ab |
| N4 | CK | 1.86±0.35 Ba | 0.01±0.00 Bb | 0.69±0.08 Ab |
| Sm | 2.62±0.23 Aa | 0.04±0.01 Aa | 1.49±0.42 Ab |
| N6 | CK | 1.26±0.22 Ab | 0.01±0.00 Bc | 0.51±0.13 Ab |
| Sm | 2.47±0.33 Aa | 0.02±0.00 Ab | 0.79±0.28 Ab |

Table 9 Principal component analysis of indexes of donor seedlings of *P. massoniana* treated with different nitrogen concentrations

| Number | Initial feature root | | | Feature roots | | |
| --- | --- | --- | --- | --- | --- | --- |
| Eigenvalue | Contribution rate/% | Cumulative contribution rate/% | Eigenvalue | Contribution rate/% | Cumulative contribution rate/% |
| 1 | 13.095 | 50.365 | 50.365 | 13.095 | 50.365 | 50.365 |
| 2 | 4.830 | 18.576 | 68.941 | 4.830 | 18.576 | 68.941 |
| 3 | 2.898 | 11.147 | 80.088 | 2.898 | 11.147 | 80.088 |
| 4 | 1.381 | 5.310 | 85.398 |  |  |  |
| 5 | 1.256 | 4.831 | 90.229 |  |  |  |
| 6 | 0.831 | 3.197 | 93.425 |  |  |  |
| 7 | 0.471 | 1.813 | 95.238 |  |  |  |
| 8 | 0.314 | 1.207 | 96.445 |  |  |  |
| 9 | 0.263 | 1.013 | 97.457 |  |  |  |
| 10 | 0.227 | 0.874 | 98.331 |  |  |  |
| 11 | 0.173 | 0.666 | 98.997 |  |  |  |
| 12 | 0.081 | 0.31 | 99.307 |  |  |  |
| 13 | 0.067 | 0.258 | 99.565 |  |  |  |

Table 10 Scores of different nitrogen concentration treatment factors of donor seedlings of *P. massoniana*

|  | F1 | F2 | F3 | F | Order |
| --- | --- | --- | --- | --- | --- |
| Sm-N4 | 4.9237 | 1.4157 | -0.7426 | 5.5969 | 1 |
| Sm-N6 | 5.0581 | -2.2912 | 2.6259 | 5.3927 | 2 |
| Sm-N2 | 0.9149 | 2.0572 | 0.6134 | 3.5855 | 3 |
| Sm-N0 | -1.7264 | 3.6711 | 0.3444 | 2.2892 | 4 |
| CK-N4 | 1.1312 | -0.0253 | -3.0236 | -1.9177 | 5 |
| CK-N0 | -5.6890 | 0.2430 | 1.8541 | -3.5919 | 6 |
| CK-N6 | -1.0463 | -2.6558 | -0.8741 | -4.5762 | 7 |
| CK-N2 | -3.5663 | -2.4147 | -0.7974 | -6.7785 | 8 |

Table 11 Principal component analysis of indexes of recipient seedlings of *P. massoniana* treated with different nitrogen concentrations

| Number | Initial feature root | | | Feature roots | | |
| --- | --- | --- | --- | --- | --- | --- |
| Eigenvalue | Contribution rate/% | Cumulative contribution rate/% | Eigenvalue | Contribution rate/% | Cumulative contribution rate/% |
| 1 | 11.961 | 46.002 | 46.002 | 11.961 | 46.002 | 46.002 |
| 2 | 3.672 | 14.122 | 60.124 | 3.672 | 14.122 | 60.124 |
| 3 | 2.744 | 10.555 | 70.680 | 2.745 | 10.555 | 70.680 |
| 4 | 2.056 | 7.906 | 78.586 | 2.056 | 7.906 | 78.586 |
| 5 | 1.687 | 6.487 | 85.073 |  |  |  |
| 6 | 1.049 | 4.034 | 89.107 |  |  |  |
| 7 | 0.794 | 3.055 | 92.162 |  |  |  |
| 8 | 0.684 | 2.631 | 94.793 |  |  |  |
| 9 | 0.447 | 1.718 | 96.511 |  |  |  |
| 10 | 0.328 | 1.262 | 97.773 |  |  |  |
| 11 | 0.218 | 0.839 | 98.612 |  |  |  |
| 12 | 0.145 | 0.556 | 99.168 |  |  |  |
| 13 | 0.067 | 0.258 | 99.565 |  |  |  |

Table 12 Scores of different nitrogen concentration treatment factors of recipient seedlings of *P. massoniana*

|  | F1 | F2 | F3 | F | Order |
| --- | --- | --- | --- | --- | --- |
| Sm-N4 | 4.9237 | 1.4157 | -0.7426 | 5.5969 | 1 |
| Sm-N6 | 5.0581 | -2.2912 | 2.6259 | 5.3927 | 2 |
| Sm-N2 | 0.9149 | 2.0572 | 0.6134 | 3.5855 | 3 |
| Sm-N0 | -1.7264 | 3.6711 | 0.3444 | 2.2892 | 4 |
| CK-N4 | 1.1312 | -0.0253 | -3.0236 | -1.9177 | 5 |
| CK-N0 | -5.6890 | 0.2430 | 1.8541 | -3.5919 | 6 |
| CK-N6 | -1.0463 | -2.6558 | -0.8741 | -4.5762 | 7 |
| CK-N2 | -3.5663 | -2.4147 | -0.7974 | -6.7785 | 8 |
